# Supplementary material for: An investigation of Li2TiO3–coke composite anode material for Li-ion batteries
Source: Royal Society of Chemistry journal article supplement (doi:10.1039/c9ra02611h), 2019-01-01
Supplement: c9ra02611h1.pdf [file c9ra02611h1.pdf]

## Supplementary Information

### An Investigation of $\text{Li}_2\text{TiO}_3$ -coke Composite Anode Material for Li-ion Batteries

Youlin Liu, Wensheng Li, Xiaoping Zhou\*

#### Section1

The Laser Raman characterization shows that the preheated oil coke has 2 bands the D band at  $1360\text{ cm}^{-1}$  and the G band at  $1580\text{ cm}^{-1}$ . The ratio of the D band intensity ( $I_D$ ) to the G band intensity ( $I_G$ ) is 0.91 ( $I_D/I_G = 0.91$ ), which indicate that the preheated oil coke is amorphous. The shift of the Raman band at  $1580\text{ cm}^{-1}$  to  $1562\text{ cm}^{-1}$  (graphite), associated with the degree of graphitization, corresponds to a deviation from a perfect graphite crystal plane (Fig. 1). [*Min Gyu Choia,b, Young-Gi Leea, Seung-Wan Songb, Kwang Man Kim ; Anode properties of titanium oxide nanotube and graphite composites for lithium-ion batteries, Journal of Power Sources 195 (2010) 8289–8296; T.C. Chieu, M.S. Dresselhaus, M. Endo, Phys. Rev. B 26 (1982) 5867 ; M. Endo, C. Kim, T. Karaki, Y. Nishimura, M.J. Mattews, S.D.M. Brown, M.S. Dresselhaus, Carbon 37 (1999) 561*]. The TEM images also show that the preheated coke is not graphitized (Fig. 2 and Fig. 3).

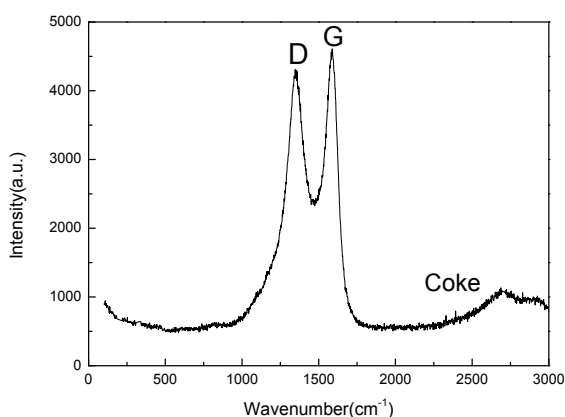

Fig. s1. The Raman spectrum of preheated coke

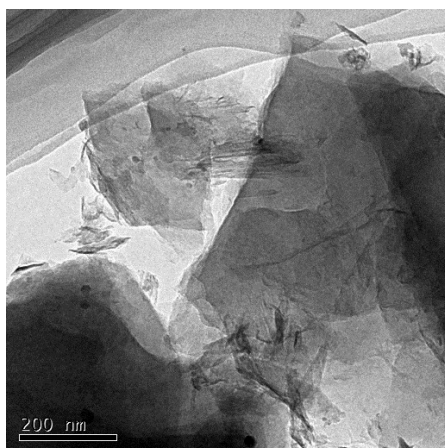

Fig. s2. TEM image of preheated coke

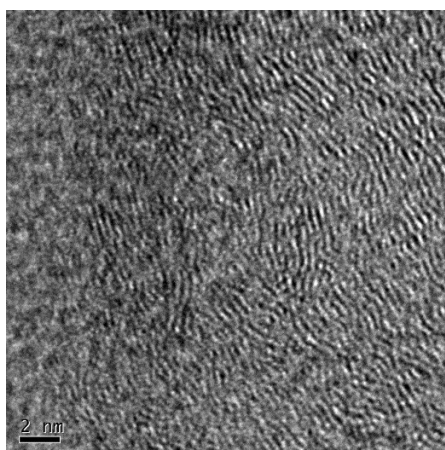

Fig. s3. HRTEM image of preheated coke.

## Section 2

The percentage of  $\text{Li}_2\text{TiO}_3$  in LTOC

LTOC (0.9998 g) was calcined at 800 °C in air for 4 h. After calcination, 0.3557 g of white powder  $\text{Li}_2\text{TiO}_3$  was obtained. The percentage of  $\text{Li}_2\text{TiO}_3$  in LTOC is 35.6wt%.

## Section 3

The EDS analysis indicates that the LTOC contains Al, Si, and S impurities, but not contains N.

Table s1. Impurities in LTOC

| <b>Element</b> | <b>Wt%</b> | <b>At%</b> |
|----------------|------------|------------|
| <b>CK</b>      | 55.6       | 67.92      |
| <b>OK</b>      | 29.83      | 27.36      |
| <b>AlK</b>     | 0.35       | 0.19       |
| <b>SiK</b>     | 0.26       | 0.14       |
| <b>SK</b>      | 0.81       | 0.37       |
| <b>TiK</b>     | 13.15      | 4.03       |
| <b>VK</b>      | 0          | 0          |
| <b>Matrix</b>  | Correction | ZAF        |

## Section 4

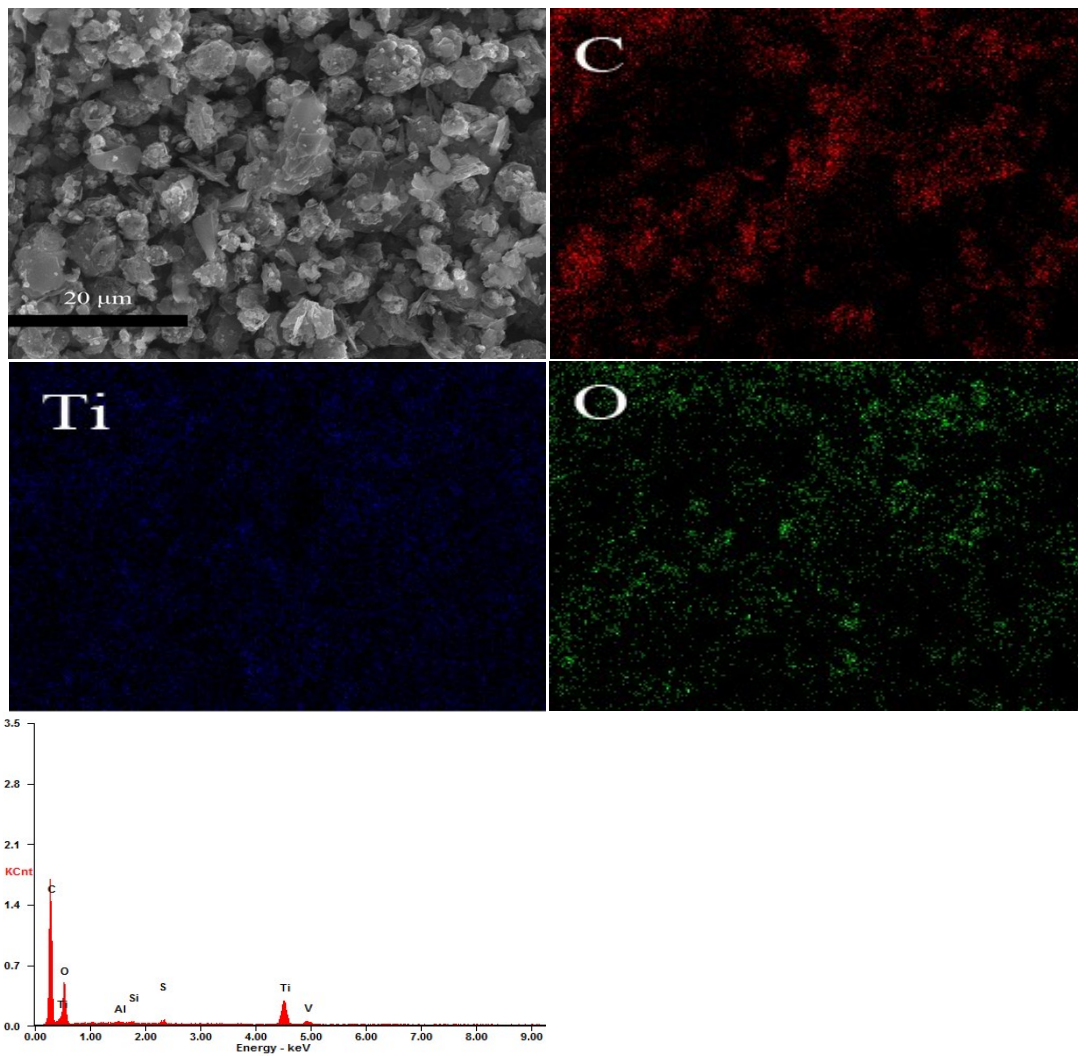

Fig. s4. EDS mapping and the EDS pattern of LTOC

## Section 5

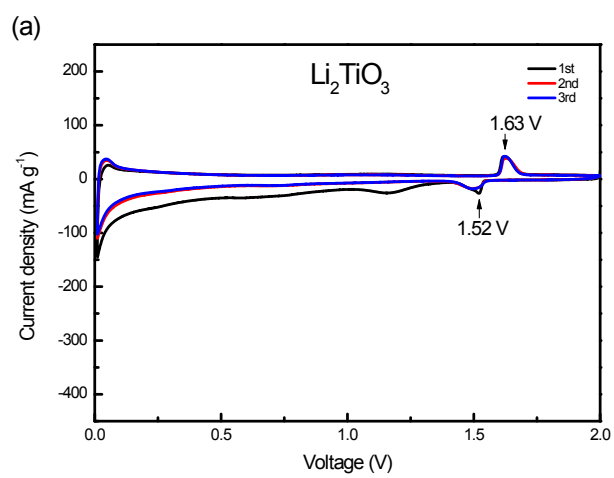

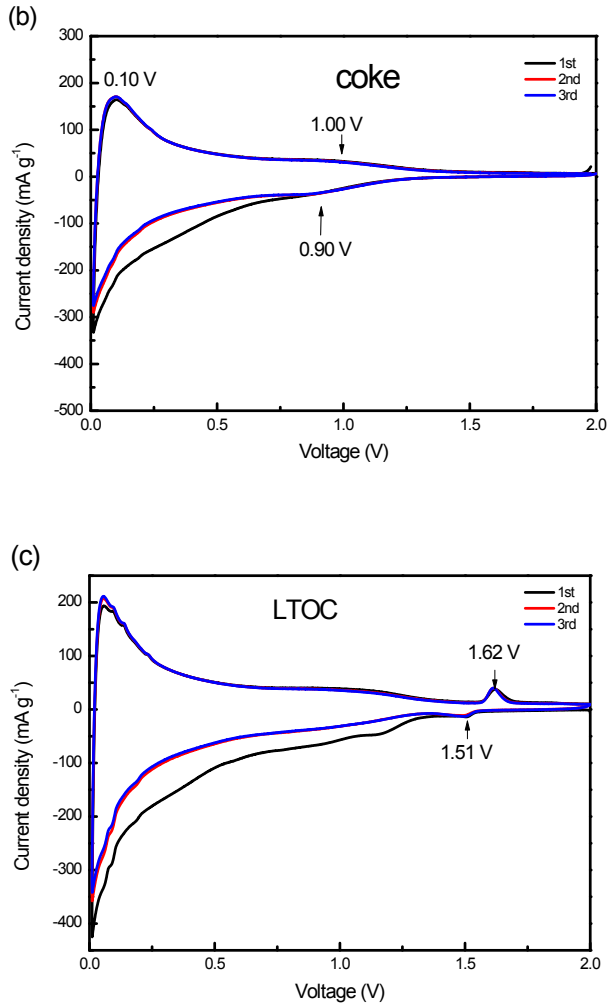

Fig. S5. The CV curves of  $\text{Li}_2\text{TiO}_3$  (a), coke (b), and LTOC (c) at a scan rate of  $0.1 \text{ mV}\cdot\text{s}^{-1}$ , within a voltage window between 0.01 and 2.00 V.

From the CV data of coke,  $\text{Li}_2\text{TiO}_3$ , and LTOC (Fig. S2), the lithium ion diffusion coefficient could be calculated through the Randles-Sevcik equation:  $I_p = (2.69 \times 10^5) n^{3/2} A D_{\text{Li}^+}^{1/2} C_{\text{Li}^+} V^{1/2}$  (1)

In equation (1),  $A$  is the electrode area ( $\text{cm}^2$ ),  $n$  is the number of electrons transferred,  $C_{\text{Li}^+}$  is the concentration of Li ion ( $\text{mol cm}^{-3}$ ),  $D_{\text{Li}^+}$  is the lithium diffusion coefficient ( $\text{cm}^2\cdot\text{s}^{-1}$ ), and  $V$  is the scan rate ( $\text{V}\cdot\text{s}^{-1}$ ). In our calculation, the area of the electrode is  $1.54 \text{ cm}^2$ , the concentration of the Li ion is  $3.1 \times 10^{-2} \text{ mol}\cdot\text{cm}^{-3}$ , and the value of  $n$  is 1.

## Section 6

Table S2. The impedance data of coke,  $\text{Li}_2\text{TiO}_3$ , and LTOC electrodes

|                           | Re ( $\Omega$ ) | Rs ( $\Omega$ ) | Rct ( $\Omega$ ) |
|---------------------------|-----------------|-----------------|------------------|
| coke                      | 2.29            | 34.30           | 59.64            |
| $\text{Li}_2\text{TiO}_3$ | 1.94            | 27.72           | 81660            |

## Section 7

From Fig. s6, the cell  $\text{LiNi}_{0.6}\text{Co}_{0.2}\text{Mn}_{0.2}\text{O}_2$ ) cathode –LTOC anode has the same cathode and anode weights with the cell  $\text{LiNi}_{0.6}\text{Co}_{0.2}\text{Mn}_{0.2}\text{O}_2$ ) cathode--  $\text{Li}_4\text{Ti}_5\text{O}_{12}$  anode, respectively. Both cells have excess amount of cathode material. However, the cell  $\text{LiNi}_{0.6}\text{Co}_{0.2}\text{Mn}_{0.2}\text{O}_2$ ) cathode –LTOC anode could store much more energy (the integration of the charge/discharge curves) than that of the cell  $\text{LiNi}_{0.6}\text{Co}_{0.2}\text{Mn}_{0.2}\text{O}_2$ ) cathode--  $\text{Li}_4\text{Ti}_5\text{O}_{12}$  anode.

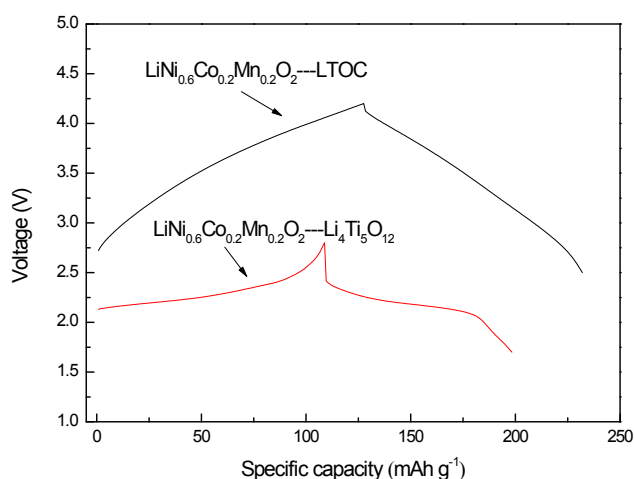

Fig. s6. The full cells: 1)  $\text{LiNi}_{0.6}\text{Co}_{0.2}\text{Mn}_{0.2}\text{O}_2$ ) cathode with LTOC anode (charge/discharged between 2.5-4.2 V, at 100mA/g calculated according to the weight of LTOC); 2)  $\text{LiNi}_{0.6}\text{Co}_{0.2}\text{Mn}_{0.2}\text{O}_2$ ) cathode with  $\text{Li}_4\text{Ti}_5\text{O}_{12}$  anode (charge/discharged between 1.7-2.8 V, at 100mA/g calculated according to the weight of  $\text{Li}_4\text{Ti}_5\text{O}_{12}$ ).

## Section 8

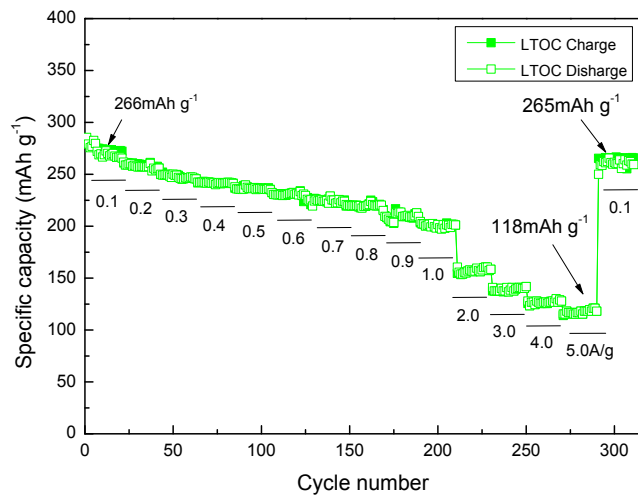

Fig. s7. The discharge/charge rate cycling test of LTOC at different current densities.
